# Supplementary material for: A Differentiation-Related Gene Prognostic Index Contributes to Prognosis and Immunotherapy Evaluation in Patients with Hepatocellular Carcinoma
Source: MDPI journal article supplement (doi:10.3390/cells11152302), 2022-07-26

**Supplementary Table S1.** Sequences of gene-specific primers used for real-time RT-PCR.

| Gene             | Primer Sequence            |
|------------------|----------------------------|
| PON1 forward     | 5'-AGGAGACCTTTGGGTTGG-3'   |
| PON1 Reverse     | 5'-ACTGTGCCATTTTCTGCAT -3' |
| ADH4 forward     | 5'-TGGATTTTGCCCTTGACT-3 '  |
| ADH4 Reverse     | 5'-GGCCGATTATTAGCTCCTC-3'  |
| SQSTM1 forward   | 5'-CTGCCTTGTTTCACCTTCC-3'  |
| SQSTM1 Reverse   | 5'-GCCCTGGCATTGTTCTTAC-3'  |
| HSP90AA1 forward | 5'-GGTTACATGGCAGCAAAGA-3'  |
| HSP90AA1 Reverse | 5'-AGCGCAGTTTCATAAAGCA-3'  |
| STMN1 forward    | 5'-ATCCCAGTTGATTGTGCAG-3'  |
| STMN1 Reverse    | 5'-CGCTTCTCCAGTTCTTTCA-3'  |

**Figure S1. Dot plots and heatmaps Amino acid showing the top 20 strongly interaction genes in PC-1 to PC-4.**

(A) The dot plots show the top 20 significantly correlated genes in each component. (B) The heatmaps show the expression patterns of the top 20 significantly correlated genes in each component. (C) The heat map indicated the top 10% of marker genes in each cluster.

**Figure S2.**

(A-N) The same expression trend was found between the up/down-regulated DRGs in subsets I/II/III/IV and the subtypes I/II/III/IV (C1/2/3/4).

**Figure S3. Analysis of immune cell infiltration and ICGs expression levels of four molecular subtypes.**

(A, B) CIBERSORT algorithm was performed to analyze the proportion of 22 types of immune cells in each sample in the ICGC datasets. The immune score (C), stromal score (D), ESTIMATE (E) and tumor purity scores (F) of all each subtype samples were calculated using the ESTIMATE algorithm between C1, C2, C3 and C4 subtypes. (G) The differential expression analysis showed that 33 ICGs of four molecular subtypes had significant differences. Kaplan-Meier analysis showed that high expression of CD40LG (H), CD274 (I), IL12B (J), PDCD1LG2 (K), CD8A (L), PTPRC (M) was correlated with good OS, while high expression of IL12A (N) and YTHDF1 (O) was associated with poor OS.

**Figure S4. Correlation analysis and difference analysis of key genes in DRGPI were performed. (A, B) Expression levels of DRGPIs in 13 clusters. (C)**

Correlation analysis of 5 genes in DRGPI showed that PON1 was positively correlated with ADH4 ( $r=0.39$ ). (D) In the ICGC dataset, there were significant differences between the 4 subtypes in the high and low DRGPI subgroups ( $P=0.001$ ). (E) DRGPI subgroups was significantly associated with stage, grade, and T staging in TCGA cohorts with complete clinical phenotypic data.

**Figure S5.** Expression levels of 5 differentiation-related genes of prognostic signature in HCC tissues and corresponding normal tissues by RT-PCR. The expression levels of STMN1 (A), SQSTM1 (B), and HSP90AA1 (C) were elevated, while those of ADH4 (D) and PON1 (E) were downregulated in HCC tissues compared to the levels in the corresponding normal tissues. Here, these RT-qPCR results are consistent with the expression of HCC tissues and normal tissues in the TCGA database (F-J).

### Figure S1

A

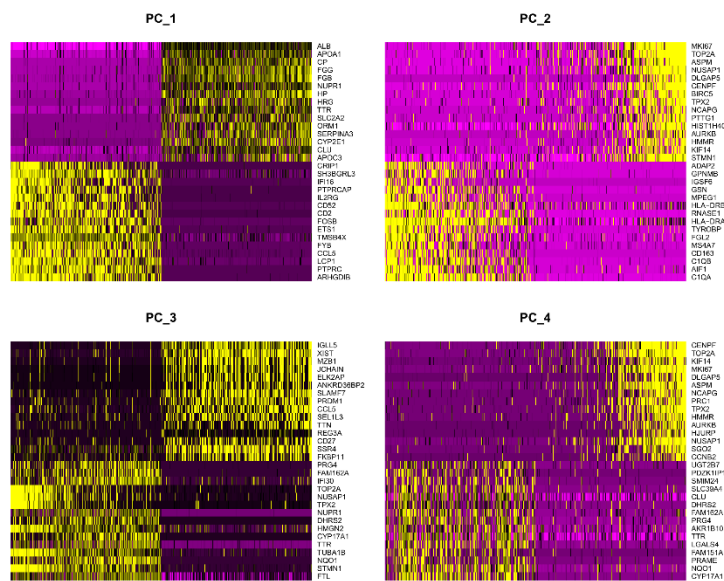

B

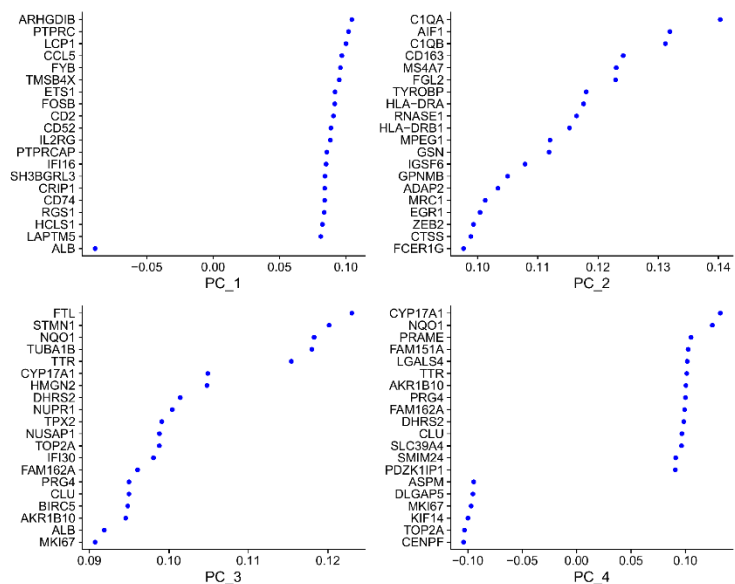

C

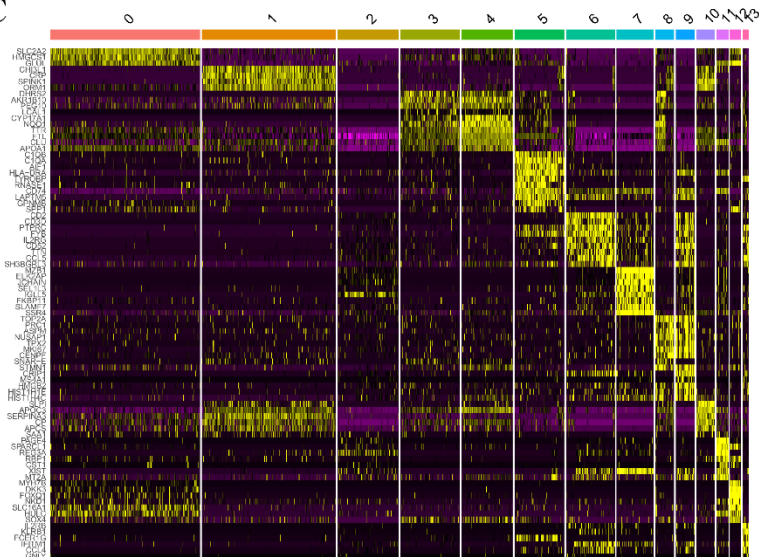

Figure S2

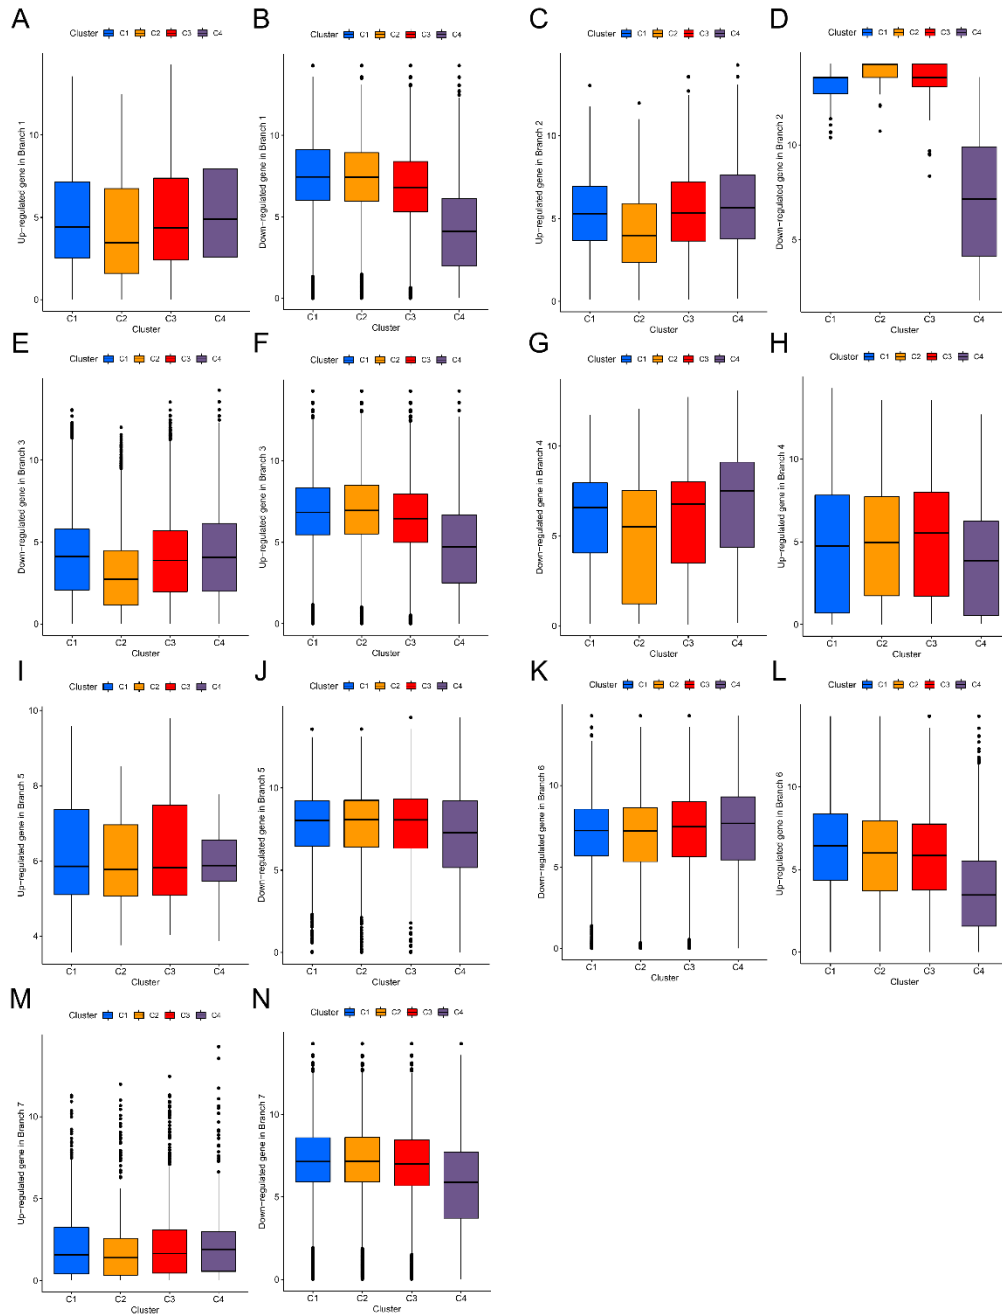

**Figure S3**

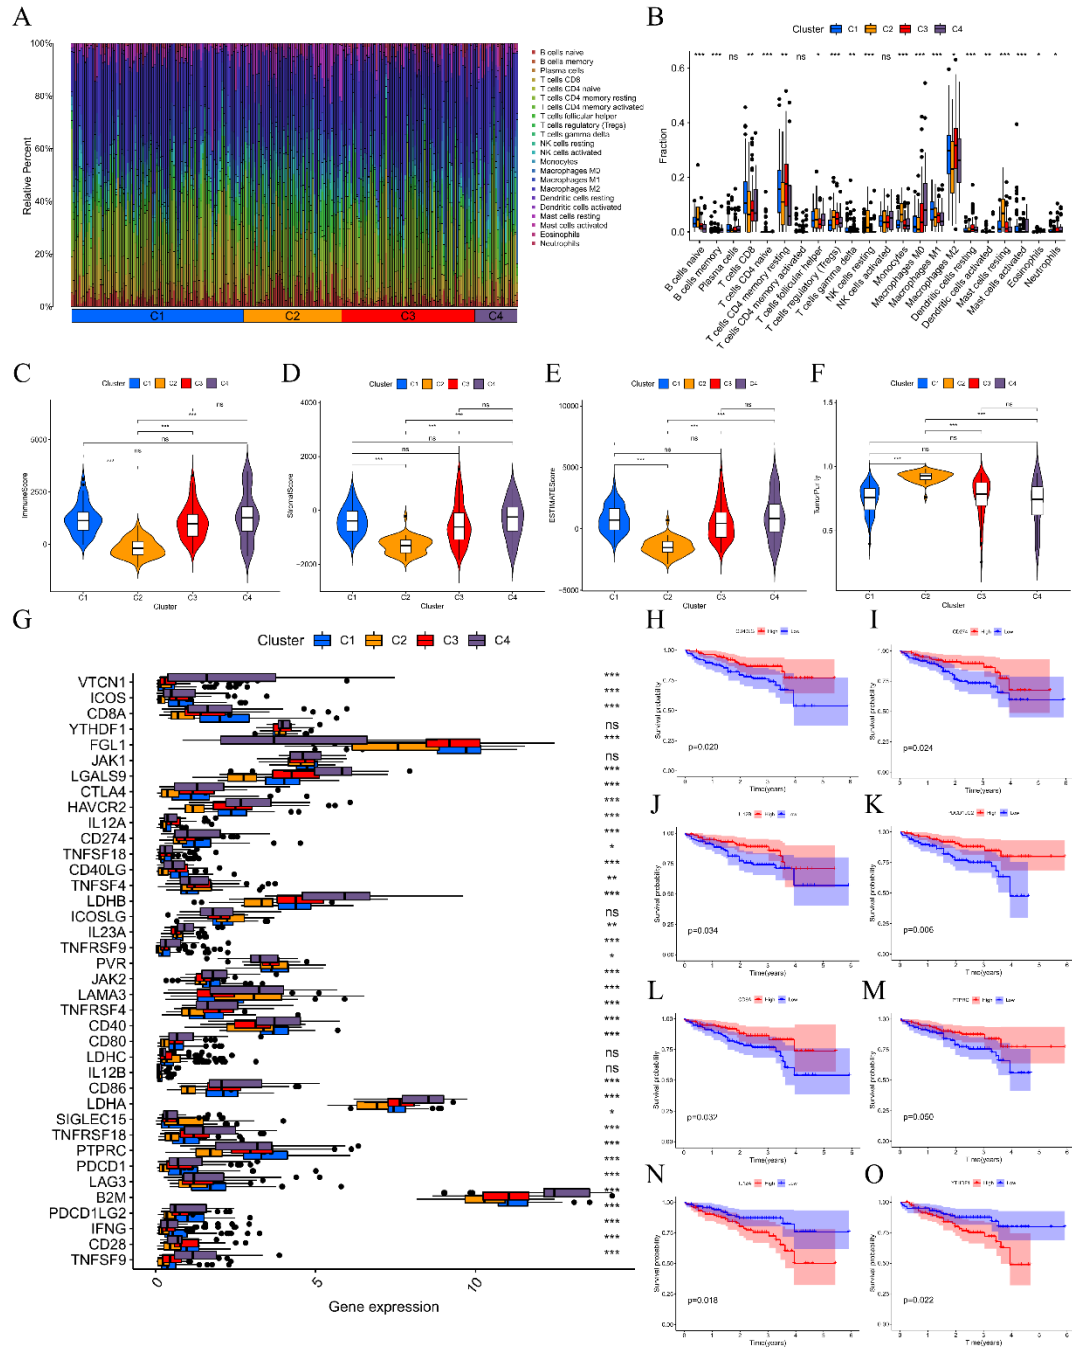

Supplementary Fig. S4

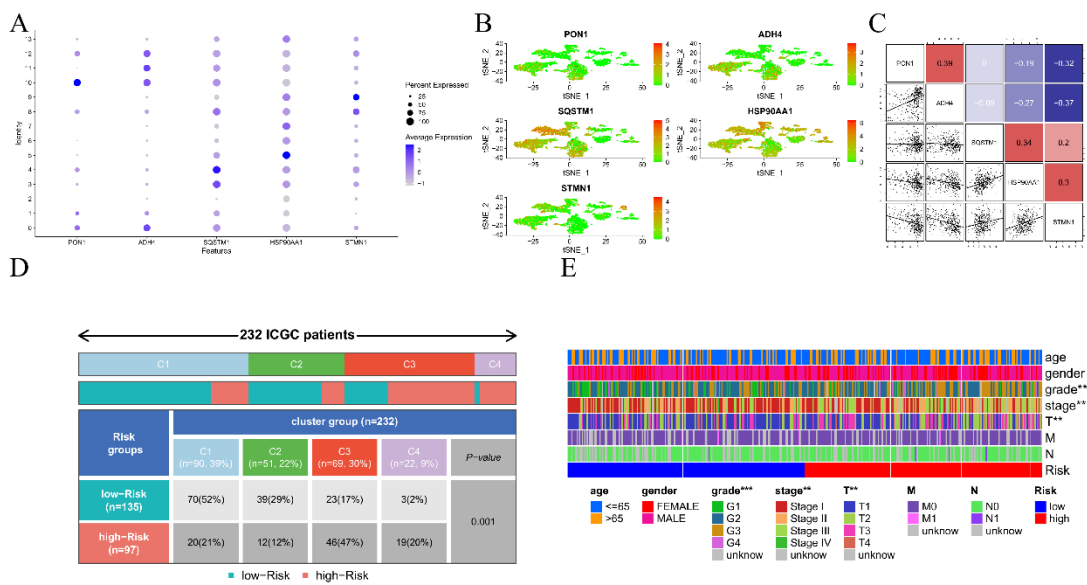

Supplementary Fig. S5

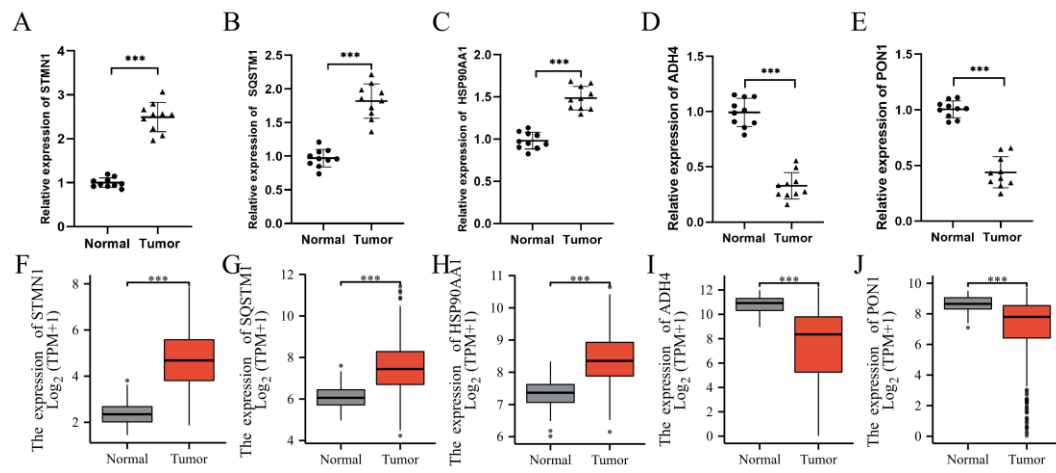

Supplement: s1 [file s1]
